# Supplementary material for: Functional mapping of microRNA promoters with dCas9 fused to transcriptional regulators
Source: Front Genet. 2023 May 5;14:1147222. doi: 10.3389/fgene.2023.1147222 (PMC10196145; doi:10.3389/fgene.2023.1147222)
Supplement: Supplementary file 1 [file Table2.XLSX]

## Sheet: Table 2 qPCR primers
Symbol	Gene ID	Forward Seq.	Reverse Seq.
Mest	17294	CAACAATGACGGCAACCTGGT	TCTGAATTTCTTCCTTTGATTAATGTACTGTA
Copg2	54160	TGATGTGGTTAAACGATGGATAAATGAAG	TGGAGACAGCAAGCCGATCAT
Tubb3	22152	CCAGTGCGGCAACCAGATAGG	AAAGGCGCCAGACCGAACACT
Nanog	71950	GCCTCTCCTCGCCCTTCCTCT	CCACCGCTTGCACTTCATCCTT
Pou5f1	18999	CTGTAGGGAGGGCTTCGGGCACTT	CTGAGGGCCAGGCAGGAGCACGAG
Fabp7	12140	TCCAGCTGGGAGAAGAGTTT	CCAACCGAACCACAGACTTA
Nes	18008	CGGAGAGGGAGCAGCACCAA	GGCCTCCCCCACAGCATCCT
Gapdh	14433	GGAGCGAGACCCCACTAACA	ACATACTCAGCACCGGCCTC
Gusb	110006	GATTCAGATATCCGAGGGAAAGG	GCCAACGGAGCAGGTTGA
Mki67	17345	TCCAGACTTCCACAGAGAC	TTCACCTTCATCCAGATTCAC
Mrpl32	75398	AGGTGCTGGGAGCTGCTACA	AAAGCGACTCCAGCTCTGCT
Tbp	21374	ACTTCGTGCAAGAAATGCTGAAT	CAGTTGTCCGTGGCTCTCTTATT
HBS1L	10767	GAATGAGGCAACAGTATCTACAGG	CTGAGCTAGCAAAATCAAAGGG
GAPDH	2597	CCCCTTCATTGACCTCAACTACAT	CGCTCCTGGAAGATGGTGA
mmu-miR-335-5p	MIMAT0000766*	TaqMan® Advanced miRNA Assays miR-335-5p #4427975 clone ID: 000546
mmu-miR-335-3p	MIMAT0004704*	TaqMan® Advanced miRNA Assays miR-335-3p #4427975 clone ID: 002185
mmu U6 snRNA	715680*	TaqMan® Advanced miRNA Assays U6 snRNA #4427975 clone ID: 001973
hsa-miR-3662	100500880	miScript SYBR Green PCR kits Universal Primer	CCCGAAAATGATGAGTAGTGACTGATG
hsa U6 snRNA	715680*	miScript SYBR Green PCR kits Universal Primer	CCCTGACACGCAAATTCGTGAAG
*: miRBase Accession Number
