# Supplementary material for: Functional mapping of microRNA promoters with dCas9 fused to transcriptional regulators
Source: Front Genet. 2023 May 5;14:1147222. doi: 10.3389/fgene.2023.1147222 (PMC10196145; doi:10.3389/fgene.2023.1147222)
Supplement: Supplementary file 6 [file Table1.XLSX]

## Sheet: Table S1 sequences of sgRNAs
sgRNA name	sequence 5' to 3'
Control sgRNA (Addgene #61424)	GGGTCTTCGAGAAGACCTGT
Control sgRNA (Addgene #61427)	GGAGACGGGATACCGTCTCT
Mest sgRNA p1	GCTCAGTGGGCTTTAAAAGT
Mest sgRNA p2	GGCGCAGCAGCTTTCCTCTG
Mest sgRNA d1	GAGGGCCCAGCGGGGCGGCG
Mest sgRNA d2	AACCAGGGGAAGGACAGCTG
Mest sgRNA d3	CAACCCAAATCACCTGCCCC
miR-335 sgRNA μ1	TTTTGAGCGCCCCTAGTGTC
miR-335 sgRNA μ2	TTACAACAGCATTTGGAGAT
miR-335 sgRNA μ3	GAAGAAACCGAGAAACAGAT
HBS1L-sgRNA1	CTTAGCTGTGCACCGCGCGA
HBS1L-sgRNA2	CGCGCGACGGCAATGCCTCA
HBS1L-sgRNA3	TCCGTCGCCCAACCTTTGGG
MIR-3662-sgRNA1	ACTGAGTGTACATGTCCCAT
MIR-3662-sgRNA2	CAATCAAGAACTATCCACAG
MIR-3662-sgRNA3	GGAACAGTGTAACATGATTG
